# Supplementary material
Source: publisher site journal article supplement (https://www.spandidos-publications.com/5030/downloadSupplementary)

Figure S1. Prognostic model for predicting 1-, 2- and 3-year DSS in PC. (A) A nomogram for the prediction of the probability of 1-, 2- and 3-year DSS of patients with PC. (B) Calibration plots of the nomogram for estimating the probability of DSS at 1, 2 and 3 years. (C) Receiver operating characteristic curve of COL7A1 expression for prediction of 1-, 2- and 3-year DSS of patients with PC. AUC, area under the curve; COL7A1, collagen type VII  $\alpha$ 1 chain; DSS, disease-specific survival; PC, pancreatic cancer; TPR, true positive rate; FPR, false positive rate.

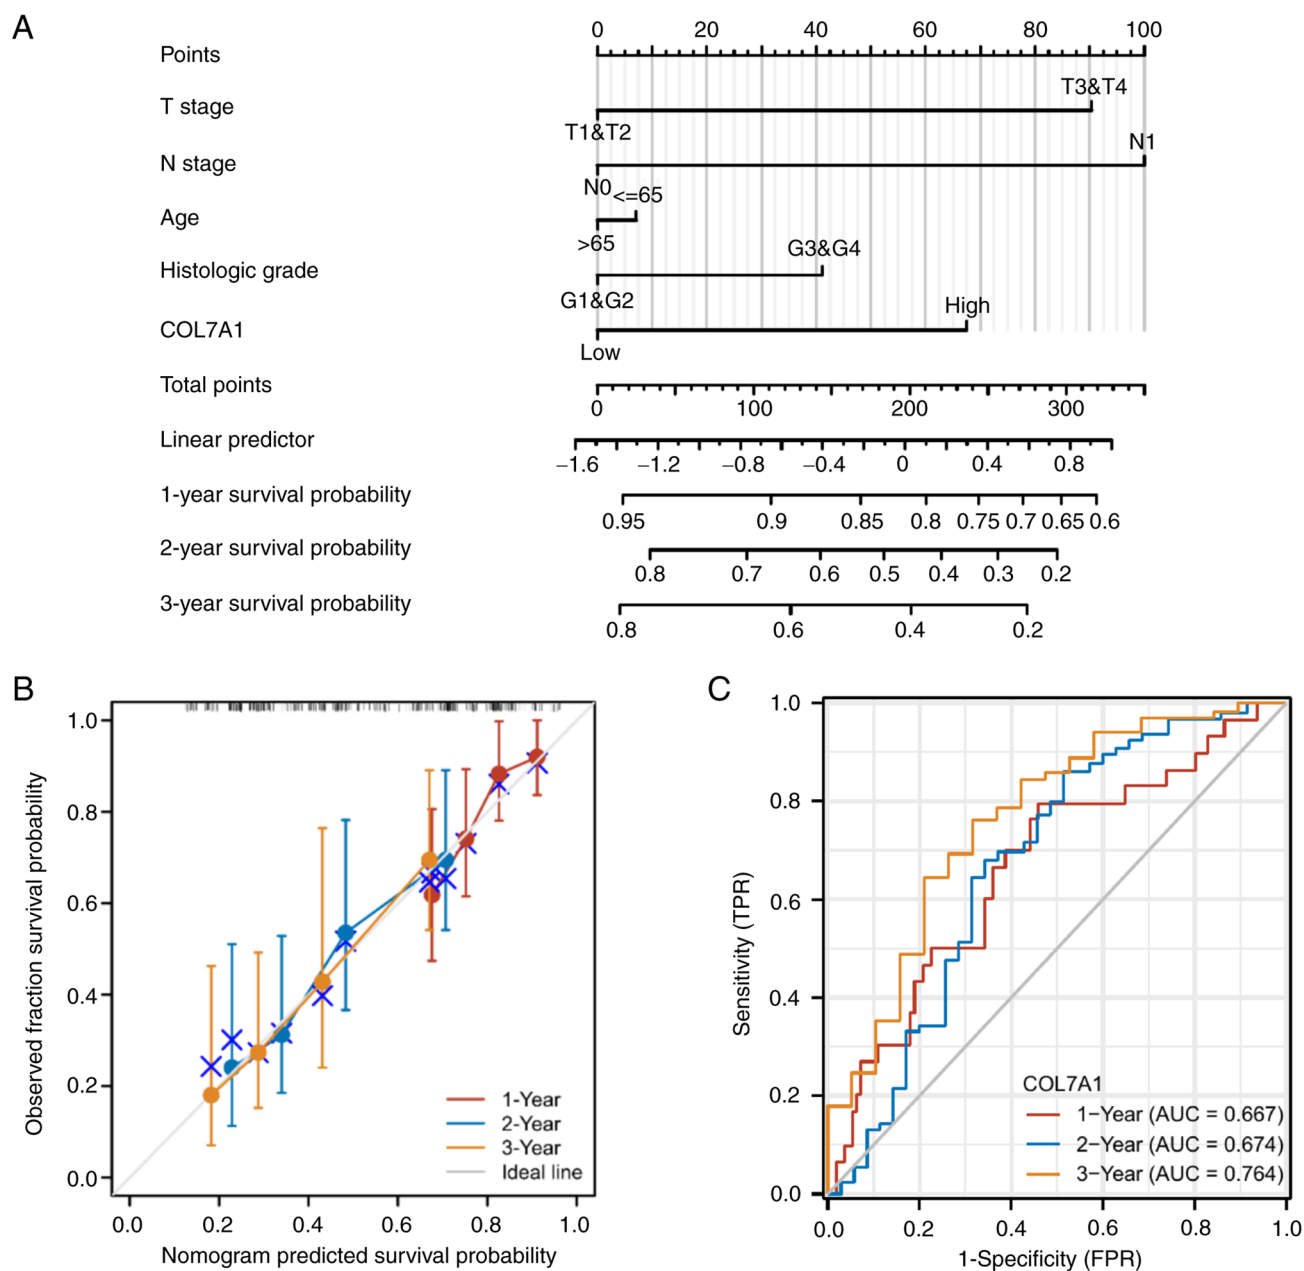

Figure S2. Prognostic model for predicting 1-, 2- and 3-year PFI in PC. (A) A nomogram for the prediction of the probability of 1-, 2- and 3-year PFI of patients with PC. (B) Calibration plots of the nomogram for estimating the probability of PFI at 1, 2 and 3 years. (C) Receiver operating characteristic curve of COL7A1 expression for predicting 1-, 2- and 3-year PFI of patients with PC. AUC, area under the curve; COL7A1, collagen type VII  $\alpha$ 1 chain; PC, pancreatic cancer; PFI, progression-free interval; TPR, true positive rate; FPR, false positive rate.

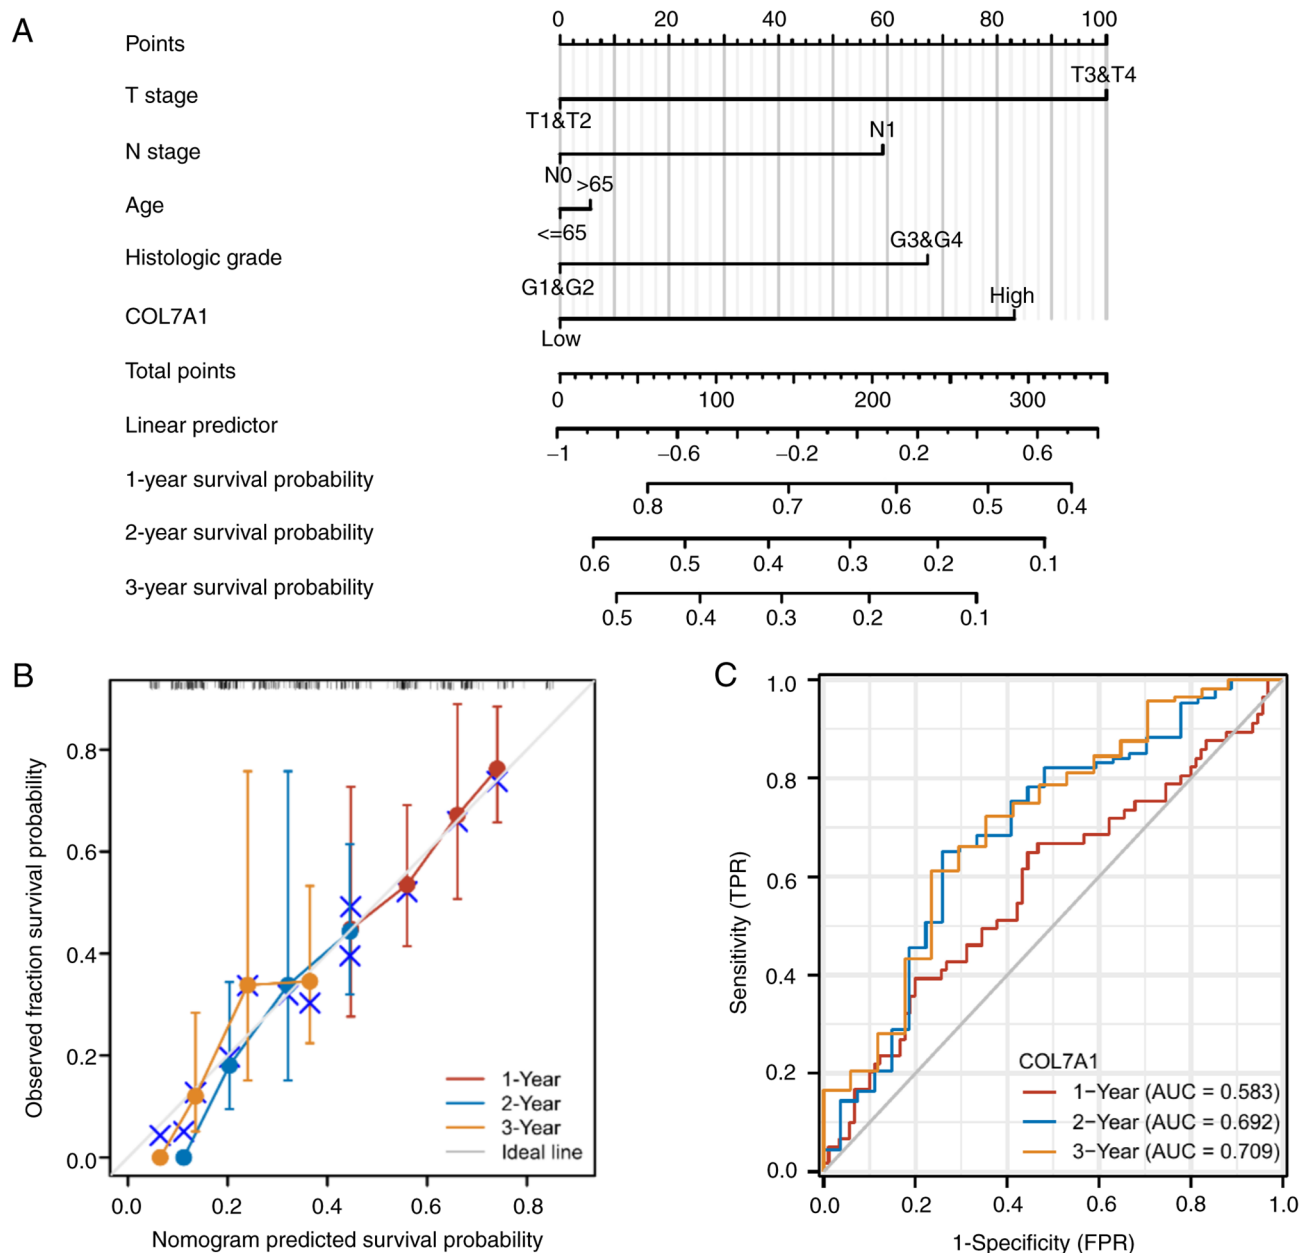

Supplement: Supplementary file 1 [file downloadSupplementary]
